# Supplementary material for: Liver sinusoidal endothelial cells contribute to the uptake and degradation of entero bacterial viruses
Source: PubMed Central journal article supplement (PMC6972739; doi:10.1038/s41598-020-57652-0), 2020-01-21
Supplement: 41598_2020_57652_MOESM1_ESM.pdf [file 41598_2020_57652_MOESM1_ESM.pdf]

## Supplementary information

### Liver sinusoidal endothelial cells contribute to the uptake and degradation of entero bacterial viruses

Cristina I. Øie<sup>1#¶\*</sup>, Deanna L. Wolfson<sup>1¶</sup>, Tanji Yasunori<sup>2</sup>, Gianina Dumitriu<sup>3</sup>, Karen K. Sørensen<sup>3</sup>, Peter A. McCourt<sup>3</sup>, Balpreet S. Ahluwalia<sup>1&</sup>, Bård Smedsrød<sup>3&</sup>

**S1 Video.** Time lapse GFP-Phage (green) accumulation in the same endocytic compartments as FSA (red) (uploaded online)

**S2 Table.** Experimental conditions under deconvolution and structured illumination microscopy. Excitation and emission ranges take into account both the polychroic mirror and filters.

| Figure       | Instrument | Modality                | Fluorophore    | Excitation     |              |               | Emission $\lambda$ (nm) | Z-stack ( $\mu\text{m}$ ) | Timelapse  |
|--------------|------------|-------------------------|----------------|----------------|--------------|---------------|-------------------------|---------------------------|------------|
|              |            |                         |                | $\lambda$ (nm) | Transmission | Exposure (ms) |                         |                           |            |
| 2A,B,C       | OMX        | Deconvolution           | AF647-FSA      | 639-652        | 10 %         | 7             | 664-702                 | 8                         | 13 x 5 min |
|              |            |                         | GFP-Phage      | 462-492        | 50 %         | 100           | 505-549                 |                           |            |
| 2D,E         | OMX        | Structured Illumination | CellMask Green | 488            | 10 %         | 15            | 505-549                 | 2                         |            |
| 3 (90 min)   | DV Elite   | Deconvolution           | AF647-FSA      | 625-643        | 10 %         | 30            | 662-696                 | 4                         |            |
|              |            |                         | LysoTracker-99 | 531-556        | 5 %          | 50            | 575-611                 |                           |            |
| 3 (Monensin) | OMX        | Deconvolution           | AF647-FSA      | 639-652        | 50 %         | 35            | 664-702                 | 8                         |            |
|              |            |                         | LysoTracker-99 | 562-580        | 31,30 %      | 10            | 592-627                 |                           |            |
| 3 (4 h)      | DV Elite   | Deconvolution           | AF647-FSA      | 625-643        | 10 %         | 50            | 662-696                 | 6,6                       |            |
|              |            |                         | LysoTracker-99 | 531-556        | 32 %         | 40            | 575-611                 |                           |            |
| 3 (19 h)     | DV Elite   | Deconvolution           | AF647-FSA      | 625-643        | 10 %         | 70            | 662-696                 | 7,2                       |            |
|              |            |                         | LysoTracker-99 | 531-556        | 32 %         | 200           | 575-611                 |                           |            |

37 **S3 Figure.** Assessment of photobleaching - The max and mean fluorescence intensity over time,  
 38 normalized to value of 1. The acquisition settings are listed in the right panel.  
 39

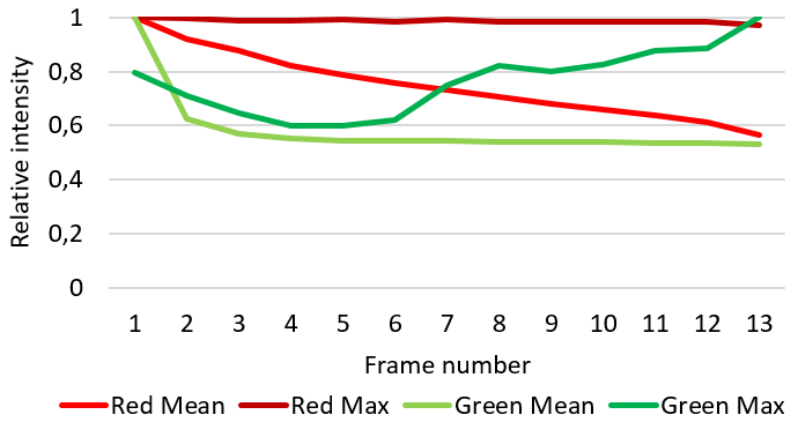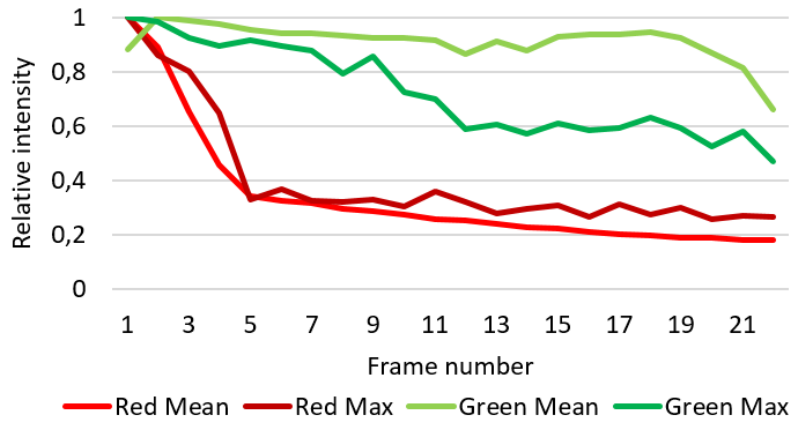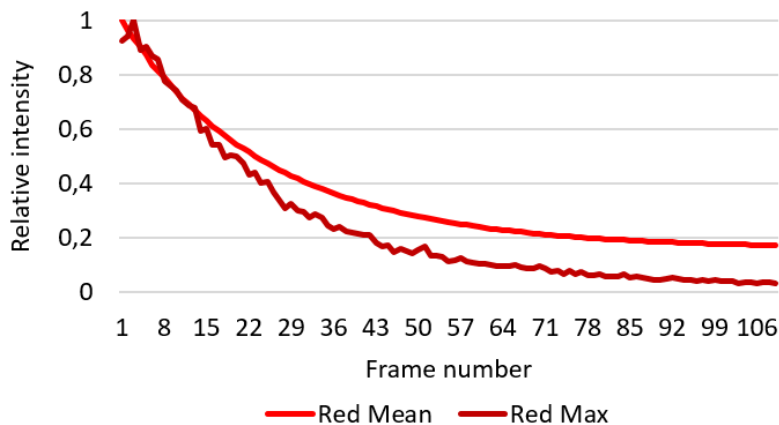

40  
 41  
 42  
 43

44 **S4 Figure. Uptake and degradation comparison between T4-phages and FSA in LSECs**  
 45 A) Time course endocytosis of  $^{125}\text{I}$ -GFP-T4-phages and B) Time course endocytosis of  $^{125}\text{I}$ -FSA  
 46 by LSECs. LSEC cultures were incubated with  $^{125}\text{I}$ -GFP-T4-phages or  $^{125}\text{I}$ -FSA for the indicated  
 47 time periods. For each time point, 3 separate wells containing cells, and 1 cell-free well were used.  
 48 After each time period, the supernatant from the cells and cell-free well was collected along with  
 49 one 0.5 ml washing volume of PBS. Tricholoacetic acid (TCA) precipitation was then used to  
 50 differentiate between free iodine = degraded phages (TCA soluble) (grey columns), and unbound,  
 51 intact phages (TCA precipitable). Cell bound and internalized phages and FSA were quantified in  
 52 the cell lysates, after solubilizing the cells in 1% SDS (white columns). The results were normalized  
 53 by subtracting the amount of radioactivity corresponding to the non-specific binding and free  $^{125}\text{I}$   
 54 in cell-free wells. Each experiment was performed in triplicates, on cells isolated from four animals  
 55 in A) (Total N=12 cell cultures for each time point), and 3 animals in B) (Total N=9 cell cultures  
 56 for each time point). Bars represent mean  $\pm$  SD. \* $p < 0.05$ , \*\* $p < 0.01$ , \*\*\* $p < 0.001$  represent the  
 57 statistical differences between the total endocytosis at 18h and 24h as compared to 4h.  
 58

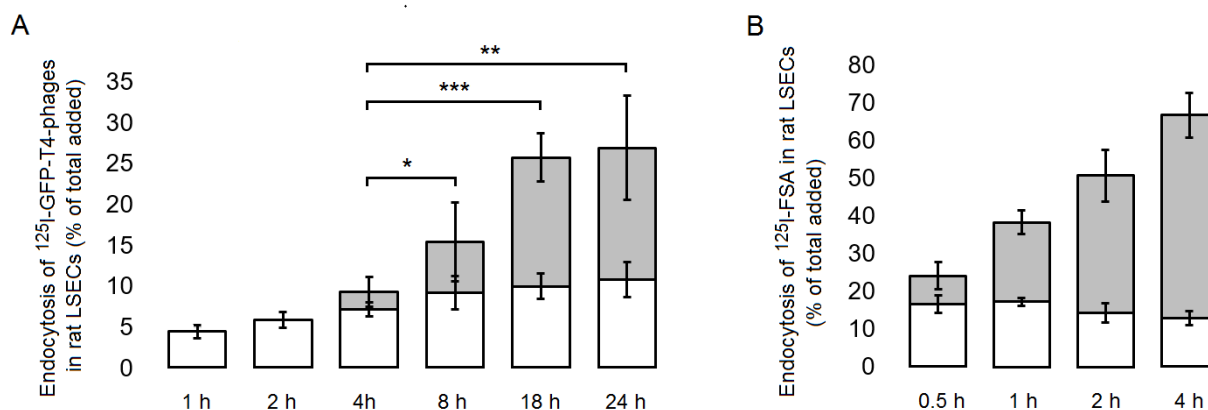

59  
60
